# Supplementary material for: Boundary Gauge Field-Induced Topological Hinge States in Photonic Metamaterials
Source: Research Square preprint supplement (doi:10.21203/rs.3.rs-5821179/v1), 2025-01-28
Supplement: Supplementary file 1 [file 02491871837fe9e1c0ed59e1.docx]

**Supplementary Materials:**

**Boundary Gauge Field-Induced Topological Hinge States**

**in Photonic Metamaterials**

Changsheng He2*, Liang Zhao2*, Shuang Zhang4,5†, Lei Zhou2,3†, Shaojie Ma1,3†

1Department of Optical Science and Engineering, School of Information Science and Technology, Fudan University, Shanghai 200433, China

2State Key Laboratory of Surface Physics, Key Laboratory of Micro and Nano Photonic Structures (Ministry of Education) and Department of Physics, Fudan University, Shanghai 200438, China

3Shanghai Key Laboratory of Metasurfaces for Light Manipulation, Shanghai 200433, China

4New Cornerstone Science Laboratory, Department of Physics, The University of Hong Kong, Hong Kong 999077, China

5Materials Innovation Institute for Life Sciences and Energy (MILES), HKU-SIRI, Shenzhen, P.R. China

†correspondence: shuzhang@hku.hk (S.Z.); phzhou@fudan.edu.cn (L.Z.) and

shaojiema@fudan.edu.cn (S.M.)

*These authors contributed equally to this work.

**This file includes:**

1. The Surface Weyl Hamiltonian at the YMM/Air Interface
2. The HOTI-type Hinge states in a YMM Cylinder
3. The Metamaterial Implementation of the YMM Cylinder
4. Details of the Experimental Measurements

**References**

**Figs. S1 to S14**

# 1. The Surface Weyl Hamiltonian at the YMM/Air interface

In this section, we detail the derivation of the effective surface Hamiltonian from the effective medium theory (EMT) of Yang monopole metamaterial (YMM) using the 𝑘 ∙ 𝑝 approximation (KPA) method.

## 1.1 The existence of Weyl arcs on the boundary between the YMM and Air

Firstly, we discuss an ideal medium satisfying the following constitutive relations:

(S1)

This medium exhibit resonant permittivity and permeability along the z-axis, and antisymmetric bianisotropic terms:

(S2)

Additionally, the medium satisfies perfect electromagnetic duality with , and both parameters are characterized by the Drude model along z-direction: . Following the derivation in Ref. [1,2], this homogeneous medium can be mapped to a 4-by-4 Hamiltonian to describe 5D YMs with nontrivial second Chern number , located at and :

(S3)

with and five Hermitian Gamma matrices satisfying These YMs reside in a synthetic 5D space constructed using three real momentum dimensions and two synthetic dimensions, defined as . Note that in this article, the two parameters and are crucial for the emergence of HOTI.

The eigenmode in the above YMM can considered as the null space of the following matrix derived from Maxwell’s equations:

(S4)

where the matrix is defined as:

(S5)

For the YMM, the eigenstates can be directly solved analytically.

Consider the boundary perpendicular to the x-direction, by matching the eigenmodes at the interface, where corresponds to the YMM and to air, the energy spectrum of the surface states should satisfy the following implicit equation:

(S6)

where and . The decay rates of the E-dominated and H-dominated surface states in the YMM are defined as:

(S7)

The decay rates in air are for both types of surface states.

Fig. S1 shows the energy spectra of the surface modes, numerically solved across different parameters. An intersection point in the dispersion of the two surface states can always be found within specific parameter region where :

(S8)

Varying from to , these intersecting degenerate points construct an arc on the synthetic four-dimensional boundary, connecting the projection of YMs with opposite , as shown in Fig. S2(a). To further illustrate the properties of this arc, we selected a sufficiently arbitrary point for detailed analysis, as shown in Fig. S2(b). By fixing the value of the corresponding and varying , one can observe the desired degenerate point at the selected frequency. This degeneracy point arises from the direct intersection of surface states, characterized by TE polarization (, ) and TM polarization (, ). Furthermore, examining the dispersion near this degenerate point in space reveals a linear dispersion along all three directions, characterizing it as a Weyl point. This degenerate arc is precisely the Weyl arc [3,4], a distinctive fingerprint of the bulk-boundary correspondence associated with the second Chern number .

## 1.2 The Effective Surface Weyl Hamiltonian using the 𝒌 ∙ 𝒑 approximation

To further characterize the behavior of the Weyl arc, we construct an effective eigenvalue equation and apply the approximation method to derive the effective surface Weyl Hamiltonian.

To naturally incorporate the resonance of the YMM in the eigenvalue equation, we introduce auxiliary variables to describe the resonant terms and reformulate Maxwell’s equation into an intrinsic equation for . These matrices near the surface WP at can be defined as follows:

(S9)

Here, we assume to simplify the expression. Note that in the system with an interface, the Hamiltonian above depends on the spatial position :

(S10)

Here, is the standard step function. As a result, for the entire system, Eq. S9 cannot yield results directly through eigenmode calculations. However, Eqs. S4-S8 have already provided numerical solutions for the dispersion spectra and associated surface field distributions for such a single-interface system. These modes are indeed solutions to the spatially dependent eigenvalue equation, and can be expressed as:

(S11)

The spatial dependent Hamiltonian and eigenstates are given as follows:

(S12)

where and the decay rate can all be numerically solved through Eqs. S4-S8. are 8-by-1 vectors, with each element being a function of . These degenerate surface states also satisfy the orthogonal normalization condition:

(S13)

Therefore, by constructing a standard eigenvalue equation, considering a standard expansion process and neglecting higher-order perturbation terms, we can obtain the following local eigenvalue equation:

(S14)

The formula of the Hamiltonian can be directly solved:

(S15)

This local Hamiltonian at a given value has the following form:

(S16)

This Weyl formulation in space highlights the intrinsic topological properties of surface states. The Fermi velocity and the degeneracy location both depend on the YMM parameters and the specific wavevector , as illustrated in the Fig. S3 for various YMM parameters. Notice that the dispersion of this surface WP Hamiltonian exhibits slight difference for different angle, due to subtle numerical differences in and and a shift in the WP location along the direction, in consistent with the results shown in Fig S1(C).

Furthermore, we compare the energy spectra obtained numerically from Eq. S6 and Eq. S16, as shown in Fig. S4. The two spectra match well across a range of parameters, even qualitatively consistent for parameters far from the WP, which confirms that the surface WP Hamiltonian accurately describes the surface states near the Weyl arc.

# 2. The HOTI-type Hinge states in a YMM cylinder

To investigate the existence of hinge states, we examine the hinge states in a cylinder oriented along the z-axis and constructed from the homogenous YMM. Notice that the shape of the x-y cross-section can be arbitrary. Furthermore, in a circular cylinder, there will be no specific geometric orientation in the x-y plane; therefore, any hinge state, if it exists, arises solely from the special properties of the YMM medium.

## 2.1 The HOTI-type Hinge States based on FEM simulation

A FEM simulation is performed to analyze the eigenstates of the YMM cylinder, based on the EMT model with magneto-electric tensor in Eq. S29-S31 or Eq. S2. The resonance of the YMM is naturally incorporated by introducing additional auxiliary variables. The simulation is implemented using the weak form module of Comsol software, with a manually defined weak form:

(S17)

Here, and are the test functions, which are, by default, selected as the basis functions used to interpolate the electric and auxiliary field. The vectors and specifically represent the dipole responses of each helical resonance.

This weak form and its related formulations are applied in this article to analyze the dispersion spectra, eigenstate field distributions, and excitation response behavior of the YMM based on the EMT description.

## 2.2 The HOTI-type Hinge States based on 1D Plane Wave Expansion Method for the Global Surface Weyl Hamiltonian

To develop a theoretical understanding of the hinge states, we further analyze the eigenstates based on the aforementioned Weyl Hamiltonian on the surface of a cylinder. For convenience, we consider a sufficiently large system to ignore the finite-size effects, allowing the response at each point to be treated using the local surface Hamiltonian.

For a cylindrical structure, the normal direction at each point along the perimeter within the x-y cross section inevitably varies from 0 to . Consequently, when focusing on the local surface states, it is necessary to apply a coordinate transformation to align the material with the local normal direction denoted by . Therefore, although the YMM is homogeneous, the values of at different boundary points will vary according to the normal direction in the local coordinate system:

(S18)

Thus, the global surface Hamiltonian along the perimeter will be inhomogeneous with respect to the normal direction :

(S19)

where depends on the local radius of curvature along the perimeter. This global surface Hamiltonian can be directly solved using a 1D plane wave expansion method (PWEM), due to the effective periodicity conditions along the entire perimeter and .

In a circular cylindrical structure, the normal direction exactly corresponds to the angular coordinate in the cylindrical coordinate system, therefore the local bianisotropy angle satisfy: . In a square cylinder structure, it can be a piecewise function, such as:

(S20)

It is worth noting that the PWEM does not require the function to satisfy a specific form. Therefore, it can be applied to cylindrical structures with any cross-section.

Consider the Fourier series of the eigenstates and substitute them into the eigenequations . Define two auxiliary variables:

(S21)

Therefore, we have the following equation to link different Fourier harmonics:

(S22)

Considering all Fourier harmonics, the entire equation forms an eigenvalue matrix equation. Therefore, the dispersion spectra and eigen-field distributions can be directly solved by truncating the eigenvalue equation to a maximum Fourier index , where is determined through convergence tests.

## 2.3 The HOTI-type Hinge States based on Chiral Zero Mode for the Local Surface Weyl Hamiltonian

Upon examining the global surface Hamiltonian on the boundary of circle cylinder, it reveals that the *continuous* variation along the perimeter is equivalent to the presence of a gauge potential corresponding to an external magnetic field. Near certain special points, the local surface Hamiltonian can be approximatively mapped to a standard form: , which represents a WP coupled with an external magnetic field. In Ref. [5], it has been theoretically verified that introducing a magnetic field into a Weyl system induces a topologically protected chiral zero mode (CZM), which manifests as a localized Hermite-Gaussian mode. In the present cylindrical system, this CZM is exactly the HOTI-type hinge state obtained through numerical calculations. It is worth noting that a detailed examination of the localized hinge modes obtained from the numerical calculations reveals that the higher-order Landau modes, corresponding to higher-order Hermite-Gaussian modes, are also localized. In this work, these modes are not specifically discussed because our focus is on the topological properties of the localized modes, with particular emphasis on the CZM modes.

Near one set of the special points satisfying where the hinge state can be numerically solved, we have the following condition , then the local surface Hamiltonian can be expressed as:

(S23)

Here, the effective gauge potential arises from variations in the boundary's normal direction , acting as an effective magnetic field along the effective -axis (i.e., along the synthetic - direction) and coupling with the synthetic WP. This synthetic magnetic field topologically induces a chiral zero mode in the synthetic surface Weyl semimetal, which behaves as a localized Hermite-Gaussian mode near on the physical surface, manifesting as a HOTI-type hinge state on the cylinder’s side boundary.

Besides, in the condition , there exists another set of special points satisfying , the local surface Hamiltonian also has a similar form:

(S24)

Here, except for the effective gauge potential to represent a magnetic field, there is also an effective electric potential to introduce an effective electric field along the circumferential direction. In Ref. [6], it has been verified that when the effective electric field is weaker than the magnetic field , i.e., in Eq. S24, a condition that can be verified numerically, a Lorentz transformation can absorb the effect of into , reducing the system to the standard scenario where only the magnetic field interacts with the surface WP. Therefore, the topological protected CZM also emerges, which manifests as a pair of hinge states localized near that satisfies when .

Away from the above topologically special points, similar local Hamiltonians still exist, with variations in always accompanied by local coordinate transformations and an effective gauge potential . However, under a local approximation, the bianisotropy terms can contribute non-zero constant terms in the leading order. For example, near a general angle has a nonzero leading term . Such a constant term can be mapped to the non-zero term in the standard Hamiltonian mentioned above, which do not affect the energy bands but shift the localized position away from , as shown in Fig. S5, which shows the differences between the localized positions of the CZMs and the expansion points under various parameters and expansion points. It is important to note that along the boundary perimeter, the Hamiltonian varies significantly at each position. This CZM mode, localized at a shifted position, is indeed inconsistent with and fails to satisfy the local Hamiltonian at that position, effectively rendering such localized CZMs nonexistent. This observation is entirely consistent with the results obtained from through a 1D plane wave expansion method.

It is worth noting that even under ideal conditions, the local approximation and the continuously varying global Hamiltonian ​ inherently exhibit discrepancies, which can be partially mitigated by introducing higher-order local approximations. However, beyond this, in a realistic system, the dispersion of the surface state leads to varying local bandgaps at different angles. As a result, the locally derived CZM mode within the local bandgap may overlaps with the surface state region of the entire system, introducing additional coupling into the hinge states. Consequently, small differences arise between the two models in determining the position and field distribution of localized modes, unless the mode is strongly localized and happens to lie entirely within the bandgap of the whole cylindrical system.

Nonetheless, the local approximation remains an effective description of the varying surface system. By analyzing the interaction between the synthetic WP in space and the synthetic magnetic field in the plane, the localization mechanism and topological properties of the hinge state can be clearly elucidated. Moreover, this approach provides reasonably accurate estimates for the localized position, resonance frequency, and degree of localization of the hinge modes, with predictions being quite precise in certain cases.

Therefore, for an arbitrary cylindrical geometric configuration described by , there are a total of (or when ) local hinge states near the critical points , satisfying the special conditions or . is another non-negative integer used to mark the additional intersection points between and an arbitrary function with fixed endpoints 0 and .

Across various ​values, the predicted number of hinge states and their localized positions align well with direct numerical calculations from . Even when hinge modes strongly couple with the boundaries, the local approximation remains an effective tool for describing the system's localized behavior, as shown in Fig. S6. Based on , the localization of these hinge states is determined by the bianisotropy strength and the local curvature radius . As approaches infinity, corresponding to a flat surface, or as decrease to zero, corresponding to an isotropic medium, the hinge state transitions from being confined to spreading out as a surface mode. These predictions are consistent with numerical verification.

Finally, we will provide a brief overview of the solution process for the local Hamiltonian described above. The dispersion spectra and eigenstates of the local surface Hamiltonian near the special points can be solved based on an equivalent lattice model in the Fock space. Taking the special point as an example. Define an auxiliary variable , one can replace both and by the ladder operators and :

and (S25)

Notably, the algebraic structures of these creation and annihilation operators satisfy the canonical bosonic commutation relation , similar to that of a harmonic oscillator. Therefore, Eq. S23 suggests a Hamiltonian in the second quantization formulation to describe the inhomogeneous classical system:

(S26)

Such a Hamiltonian operates on the Hilbert space spanned by the orthonormal Fock states , with representing the number of bosonic particles. In the real space, these Fock states are defined as a series of Hermite polynomials of order *n*. To rigorously solve this Hamiltonian, one can map the quantized Hamiltonian in Eq. S26 onto a semi-infinite quasi-1D non-Abelian tight-binding model. Mathematically, this mapping can be:

(S27)

The ladder operators connect only two states with . Besides, due to for the vacuum state, this lattice model has a physical hard boundary at the virtual lattice site . The maximum in this lattice model can theoretically approach infinity. Therefore, to solve the dispersion spectra and eigen-field distributions, we truncate the Hamiltonian to a maximum Fock state , where is determined through convergence tests.

## 2.4 The HOTI-type Hinge states in a Square Cylinder

For a square cylinder, *discontinuities* in the global surface Weyl Hamiltonian introduce an abrupt change in the gauge potential . In this situation, as tends to zero, the above approach in Eq. S25 is inapplicable. Instead, as approaches zero, the cross-section locally forms a sharp corner connecting two distinct uniform surface Hamiltonians. Consequently, we treat the local system as an effective one-dimensional domain wall problem with , where represents the standard step function. Assuming the localized mode decays exponentially on both sides and matching the boundary condition, when *discontinuities* occur near the critical points above , the CZM transitions into a topologically equivalent edge state.

For example, in the special square cylinder case described in Eq. S20, where and , an analytical solution for the dispersion spectra of hinge states can be obtained:

(S28)

This solution corresponds to a series of hinge states with better localization compared to the CZM-type hinge states.

When the critical point deviates from the corner of the square cylinder as varies, the decay rates of the localized mode on two sides become asymmetric, with one side decaying more rapidly and the other more slowly. Eventually, when or , this edge mode transitions into a surface mode localized along either the x- or y- boundary, similar to the *continuities* case as tends to infinity. Fig. S7 illustrates the evolution of the hinge state at different angles in a square cylinder. When deviates from , the hinge state loses its symmetry along the x- and y- direction boundaries, and gradually transforms into a surface state, as predicted by the local Hamiltonian.

## 2.5 Dispersion Spectra of the YMM Cylinder from Numerical Calculations

In this section, we examine the dispersion spectra of hinge states obtained through different approaches, including FEM simulations based on the EMT, the 1D PWEM based on the global surface Hamiltonian , and the combined CZM/edge state solutions derived from the local surface Hamiltonians near four critical points.

Fig. S8 compare the dispersion spectra along the direction for various YMM properties and cross-section. Overall, the three numerical approaches exhibit a consistent dispersion relationship, for both circular and square cylinder geometries. The bianisotropy induces a bandgap in both the bulk states shown in the purple region and the surface states shown in the purple dotted lines, acting as mass terms in the 3D laboratory subspace. Notably, localized hinge states emerge across various approaches, marked by orange dots to denote the CZMs or edge states in the dispersion derived from the local surface Hamiltonian.

Note that, although these topologically protected localized states consistently reside within the bandgap of the local surface Hamiltonian, these states can still overlap with anisotropic surface states across the entire perimeter. In the global spectra obtained from FEM and 1D PWEM solutions, this overlap leads to additional mode coupling, making it challenging to precisely identify the dispersion curve corresponding to each hinge state. Nevertheless, highly localized modes can still be numerically identified near the predicted positions of CZMs or edge states from the local Hamiltonian, with matching localization and field distribution, as shown in Fig. S6. Such hinge states, overlapping with the surface state region, form states similar to bound states in the continuum (BICs) or quasi-BICs.

Additionally, the local approximation of the global Hamiltonian used in 1D PWEM becomes less accurate at finite scale cases or near abrupt angles, resulting in slight differences between the results from FEM and 1D PWEM. However, these discrepancies do *not* lead to significant differences in physical results, as both methods yield nearly identical field distributions for the hinge states, as shown in Fig. S7.

## 2.6 A topological description of the existence of localized hinge states


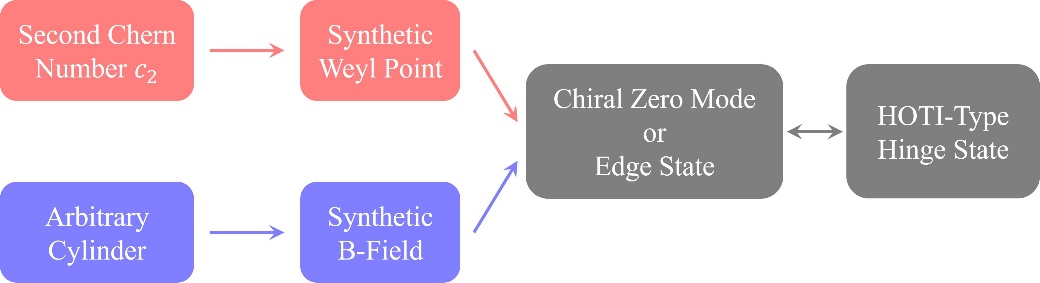


These consistencies across various models, geometric cross-sections, and YMM parameters confirm the validity of the hinge state origin as predicted by the local Hamiltonian analysis:

*The second Chern number topologically protects the existence of the surface WP Hamiltonian. The effective magnetic field, induced by inevitable variations in the normal direction along the closed cylindrical boundary, guarantees the emergence of chiral zero modes/edge states. This mechanism underlies the topological protection of the 4+2m (or 2+2m) hinge states on the side boundary of a cylinder with arbitrary shape.*

# 3. The Metamaterial Implementation of the YMM Cylinder

In this section, we present a metamaterial platform to implement the above results, discussing its effective medium correspondence, and verifying the existence of hinge states in a realistic electromagnetic structure through FEM simulation.

## 3.1 The Effective Medium Model of the Yang Monopole Metamaterial

The metamaterial is constructed from a series of well-designed and precisely oriented helical structures, as shown in Fig. 2(a). Each helical resonator is modeled as an effective electric and magnetic dipole and . Coupled the response of these dipoles with Maxwell’s equation, both the effective medium model and the intrinsic Hamiltonian can be obtained to describe the metamaterial (See details in ref. [2,7]).

The constitutive relation of the designed HOTI metamaterial can be expressed in the general formula:

(S29)

with:

(S30)

In the designed metamaterial cylinder, the fitting parameters are as follows:

(S31)

The rotation setup of the metamaterial unit is chosen as and to construct the square YMM cylinder sample described in Eq. S20 with .

## 3.2 The Hinge state in the Square YMM Cylinder

In the square YMM cylinder sample, setting aligns the geometric *discontinuities* with the four critical angles at which hinge states appear. This alignment enhances the localization of the hinge states, positioning them precisely at square cylinder’s hinges. Besides, to address the overlap in dispersion spectra, we further optimize the impedance matching between the YMM and air in practical design, by selecting a larger dielectric permittivity for the PCB substrate. This adjustment positions a specific hinge state, localized at the lower right corner, precisely within the bandgap of the boundary states, thereby facilitating subsequent analysis and measurement. In the experimental measurement, we mainly focus on this isolated hinge state, with the other three hinge states briefly validated through their dispersion relations.

We numerically calculate the dispersion spectra along for the square YMM cylinder with a unit cross-section, as described by the EMT in Eq. S29-S31, alongside the spectra for the actual metamaterial structure, as shown in Fig. S9(a-b). Both models display a distinct isolated mode positioned clearly within the bandgap of the surface modes. Although the EMT predicts a slightly larger bandgap due to the omission of coupling effects in the model, it is notable that both systems yield qualitatively consistent dispersion behavior. A further detailed analysis of the field distribution in the hinge mode reveals that the EMT model provides not only an accurate prediction of the overall field pattern but also a complete and precise description of each individual field component, as shown in Fig. S9(c-d). Such consistency further validates the accuracy of our model in describing the behavior of the entire system.

To further rule out the effects of finite system size, we conducted additional simulations on the actual metamaterial structure of varying cylinder sizes, as shown in Fig. S10. As the cross-sectional size increases, the density of surface states also increases, corresponding to higher-order quasi-Fabry-Pérot modes. However, the hinge state, isolated at the center of the bandgap, exhibits negligible changes in its dispersion and field distribution despite variations in system size. This stability effectively rules out the possibility that the hinge mode arises from finite-size effects.

# 4. Details of the Experimental Measurements

This section outlines the setup and procedures used in the experimental measurements of the square homogeneous YMM cylinder’s dispersion spectra and field distributions. As illustrated in Fig. 3, the localization of field distribution in real space and dispersion in momentum space both differ significantly between the surface modes and the hinge mode. This distinction enables each mode excited and measured selectively based on a spatially resolved experimental measurement.

The sample is constructed by stacking up 480 printed circuit board layers, corresponding to 80-unit cells along the z direction, with a unit cross-section, as shown in Fig. 4(a). These uniform samples are assembled into four groups. Depending on the experimental aims, different configurations of these building blocks allow for either an extended length in the z-direction to improve resolution, or a larger measurement area on the side boundary of the square cylinder to capture field localization characteristics.

The experimental setup is shown in Fig. S11. The excited wave is launched by a vertically positioned monopole antenna along the z-direction, placed closely to the bottom boundary of the stacked metamaterial, either at the center or at the lower right corner of the bottom edge to selectively target surface and isolated hinge states. Field distributions on the and side boundaries are detected via near-field scanning using a monopole antenna or a dipole antenna, each aligned perpendicularly to the boundary. The dipole antenna (XB-ODA6-8S, Beijing Xibao Electronic Technology Co., Ltd), with a gain of 2 dB in the frequency range of 6-8 GHz, is used to measure nearly pure parallel polarization components on the surface, minimizing the influence of the other modes and enabling further distinction between different types of eigenmodes. The near-field scanning probe is mounted on a high-precision displacement table, with a motion error of less than 0.02 mm, allowing accurate measurement of the field distributions on the side boundary of the sample.

To better compare the experimental phenomena, we used FEM simulation to perform full-wave simulations on a cylinder structure of the same size formed by the effective medium in Eq. S29-S31, under identical excitation and detection setups. A discrete-time Fourier transform (DTFT) is implemented to the simulated/measured field distributions to obtain the dispersion spectra of the hinge/surface states.

Based on the measurements of an 80-period sample, with excitation at either the lower right corner or the center of bottom edge, the DTFT of the data along the z-direction, collected from points aligned with the excitation location in the plane, provides the corresponding dispersion relations, as shown in Fig. 4. At each frequency, the wave excited on the surface always occupies a larger region in 𝑘-space, while the wave excited at the lower right corner is almost localized to a specific . Additionally, there is a clear bandgap for the surface states, with the isolated hinge state positioned exactly within this bandgap​, as shown in Fig. 4(d) and in Fig. S12 across different frequencies. It should be noted that, it is challenging to clearly observe the dispersion relation of the hinge state at higher values, above about 6.5GHz in the measurements, as the lower group velocity at these values leads to increased absorption.

Fig. S13 shows the field distributions on the and planes simulated/measured at different frequencies with excitation at the lower right corner. The red and blue boxes indicate regions on the side boundaries of the YMM sample. In the measurements, portions of the field distribution data are actually measured in the air region adjacent to the YMM sample to demonstrate the localization at the surfaces or hinges. The measurement results are consistent with the corresponding simulation results in terms of propagation behaviors and wavevectors.

Consistent with the dispersion relation results shown in Fig. 4(c), at frequencies lower than 6.5 GHz, the localized hinge state transmits along the hinge of the sample with a relatively low loss rate, resulting in higher intensity after DTFT. Conversely, at frequencies above 6.5 GHz, the localized hinge state decays rapidly along the z-direction, leading to lower intensity in the same dispersion spectra.

Additionally, unlike dispersion measurements that focus solely on the field distribution along the hinge, the field distribution results reveal that point excitation sources at the sample’s corners also excite obliquely propagating surface modes. These excitations can be observed in both simulations and experiments, resulting from the frequency overlap between the surface states and hinge state, as well as the spatial overlap between the surface states and the corner excitation. Furthermore, due to the almost linear dispersion on the equal frequency contour of the surface states, the excited surface modes are almost directed toward a specific oblique direction. As the frequency increases, the tilt angle gradually decreases, causing the oblique emission direction to shift toward the x- or y- direction. This is entirely consistent with the predictions of group velocity shown in in Fig. S14.

Fig. S15 shows the corresponding field distributions on the and planes simulated/measured at different frequencies with excitation at the center of the bottom edge. Although the presence of numerous edge states with varying group velocities and decay lengths, we can observe relatively clear propagation behavior of the edge states within the frequency range where the modes exist. These surface states propagate along the entire side boundary of the sample, exhibiting a spatial field distribution behavior entirely different from that of the localized hinge state.

To further validate the theoretically predicted four topologically protected hinge states, Fig. S16 presents the measured dispersion relations for hinge states along different corners. Due to the coupling between the material’s bianisotropy and the geometric anisotropy of a square cylinder, there are slight differences in the dispersion spectra for these four hinge states, with only one located within the bandgap of the surface states. Given the strong overlap between the other three hinge states and the surface states in the dispersion relations, field distributions on the two surfaces adjacent to the hinge were not specifically measured. Instead, the field along the excited hinge were measured and Fourier-transformed to extract the corresponding dispersion spectra, following the same approach as in Fig. 3(c).

Simulated and experimental results both demonstrate that, despite the strong overlap, clear hinge state excitations can still be observed at the predicted positions. All four hinge states are confined within a small range in the momentum space, in clear contrast to the measured surface states, which occupy a larger region. These results, consistent with simulations based on both the EMT model and the actual metamaterial structure, strongly confirm the accuracy of our theoretical predictions.

In summary, through spatially resolved experimental measurements combined with theory and simulation, we confirmed the existence of the localized hinge states in the homogeneous YMM cylinder, providing direct evidence of a topologically protected HOTI-type state in a homogeneous electromagnetic medium.


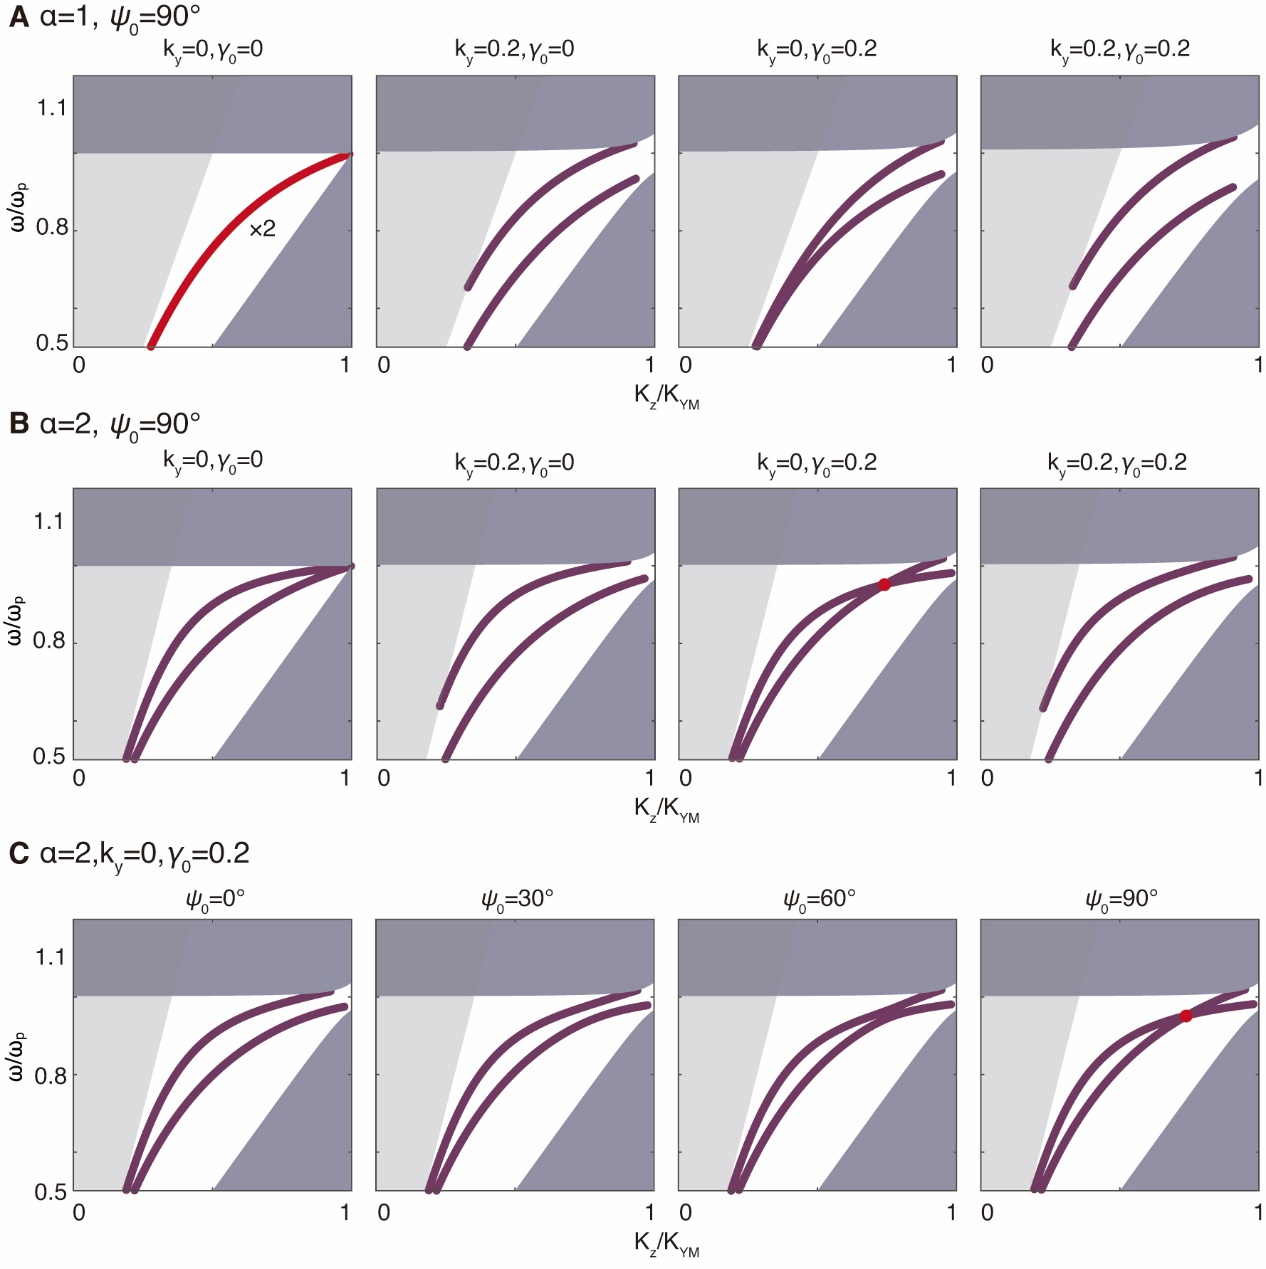


**Figure S1. Numerical dispersion spectra for the surface states at the x-direction interface between the YMM and air.** (a, b) The evolution of dispersion at different values of and (a) ; (b) . (c) The evolution of dispersion for different values of with . The red dots represent the intersection points of the two types of surface states, i.e., surface Weyl points on the Weyl arc.


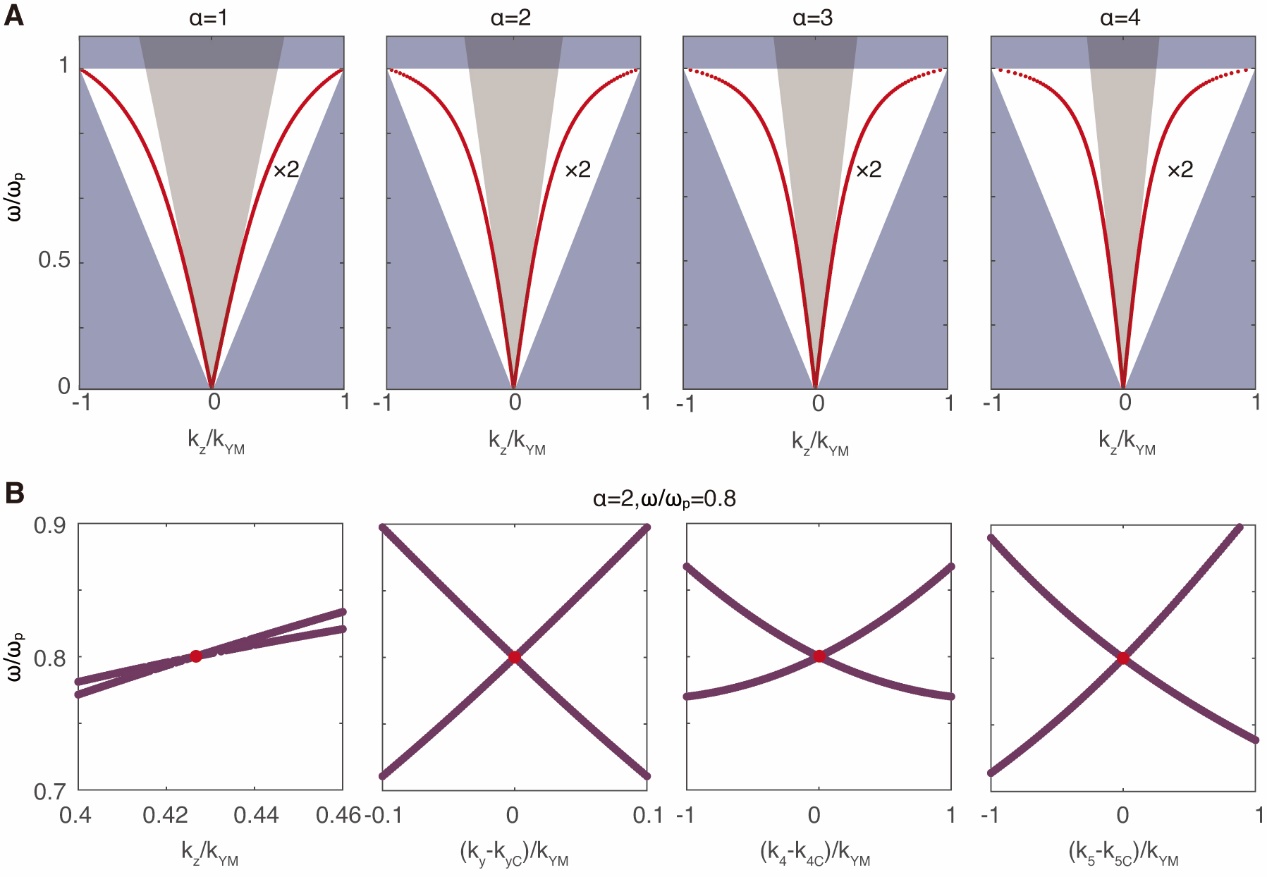


**Figure S2. Illustration of the Weyl arcs on the 4D synthetic space.** (a) Numerical verifications of the existence of the surface Weyl arcs for various values of , using the frequency-dependent parameters as determined by Eq. (S8). (b) With a fixed parameters, the evolution of the dispersion relation near the degenerate surface Weyl points across the entire 4D synthetic boundary state space, i.e., .


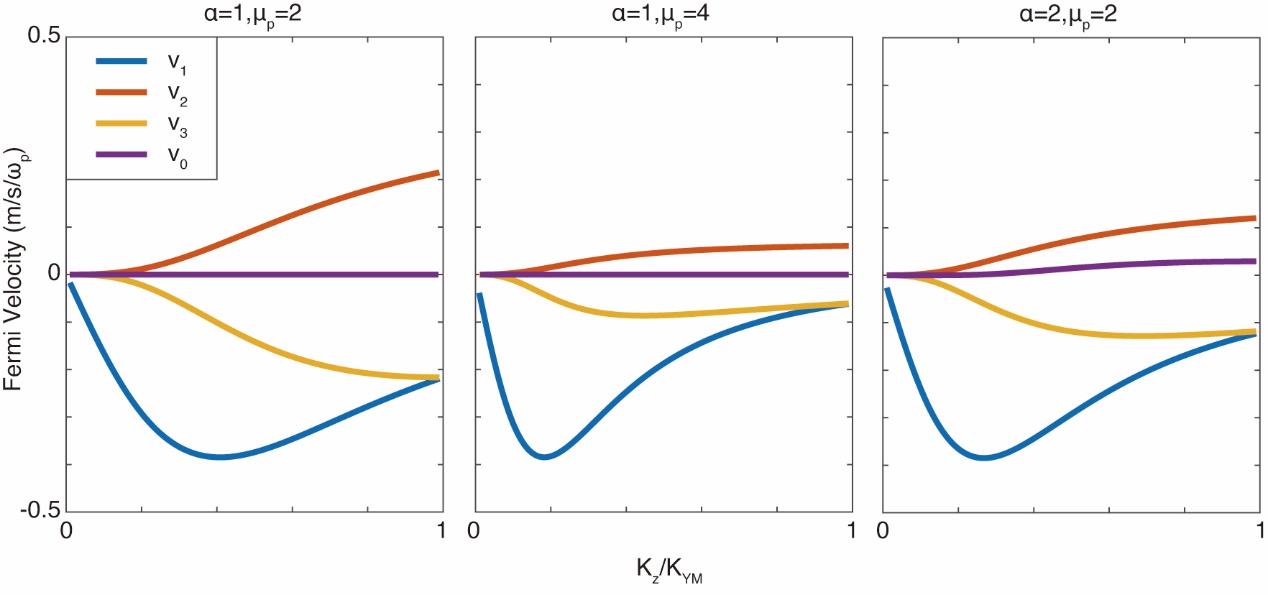


**Figure S3. Numerical calculations of the Fermi velocities of the surface WP Hamiltonian for various YMM parameters and wavevector .**


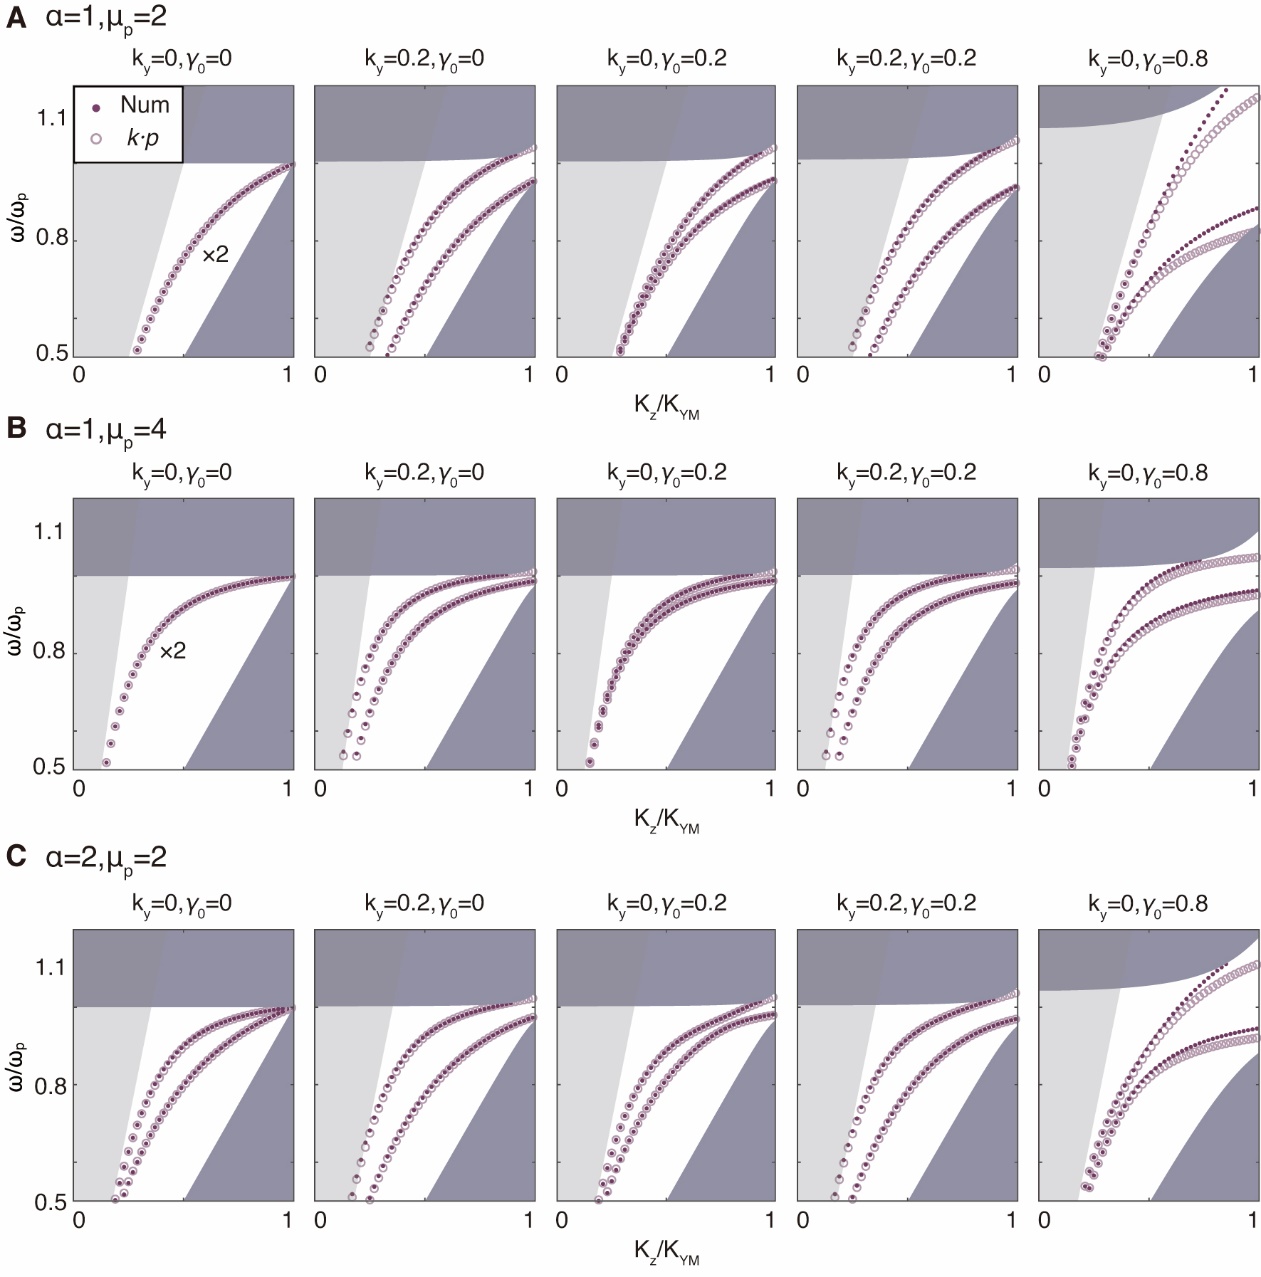


**Figure S4. Comparison of the dispersion spectra** **of the surface state, obtained via direct numerical solution and** **the local Hamiltonian.** (a-c) Evolution of the dispersion along the direction for different values of and at : (a) ; (b) ; (c) . Dots and circles represent results from direct numerical solution and the local Hamiltonian, respectively.

**
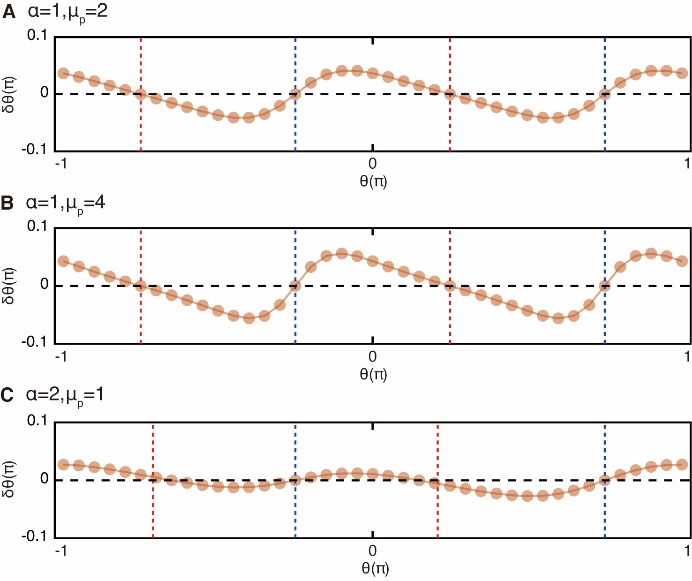
**

**Figure S5. Illustration of the validity of the local approximation at different expansion points .** (a-c) represents the deviation of the localized position , derived from the local Hamiltonian from the expansion points , evaluated for various YMM parameters. The red and blue dashed lines correspond to the localized positions predicted by the special conditions and , respectively. In the calculation, we set and .


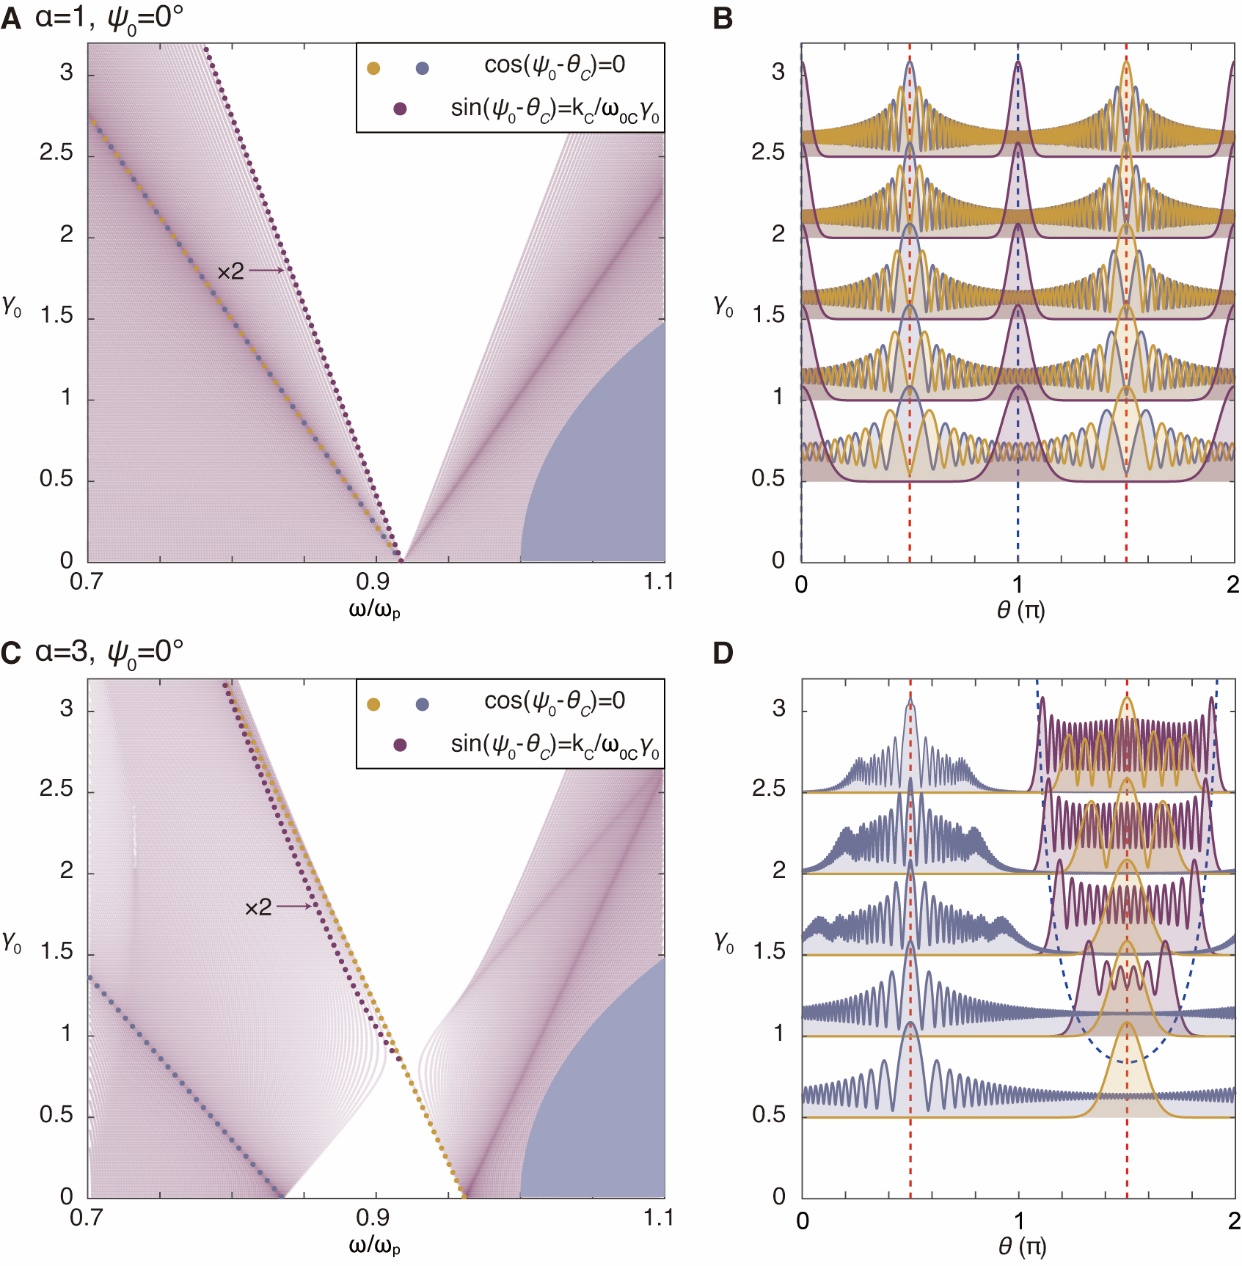


**Figure S6. Numerical validation of the accuracy of in predicting the frequency and position of localized modes.** (a) The dispersion relations derived from for different ​values, along with the eigenfrequencies of CZMs predicted by (b) The energy density distributions of the localized hinge modes, calculated using ​ and identified near the predicted CZM frequencies, exhibit localization behaviors closely aligned with the angles predicted by , for different ​parameters. (c-d) similar to (a-b), but for a more general case where and .


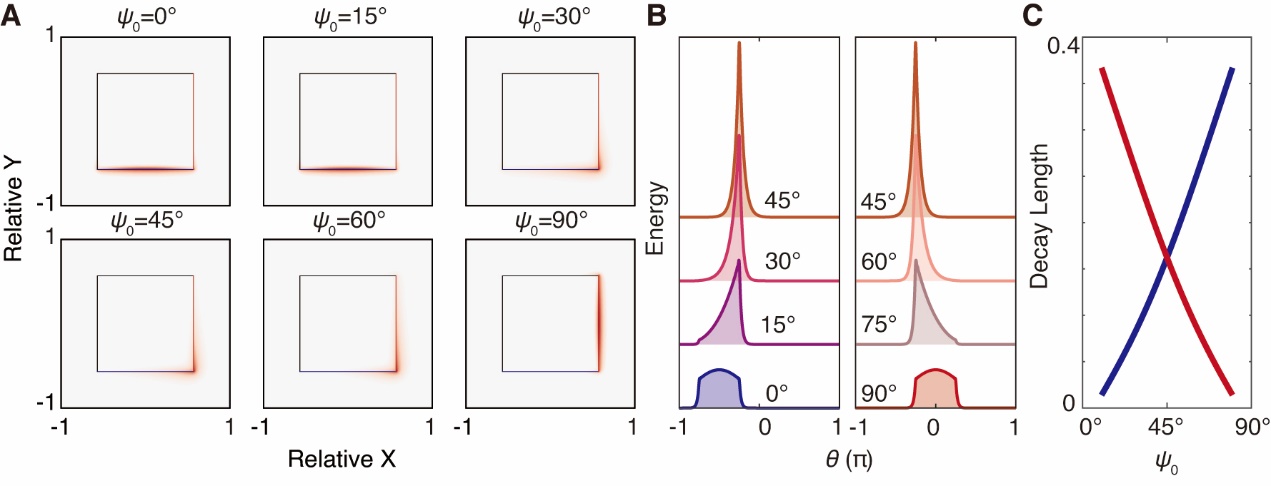


**Figure S7. The evolution of the hinge state at different angles in a square cylinder with .** (a) Field distributions of the bottom-right corner mode at various angles, obtained from rigorous FEM simulations based on the EMT. (b) The same evolution for the edge states solutions derived from the global surface Hamiltonians. (c) The evolution of the decay length along the two sides of the sharp corner.


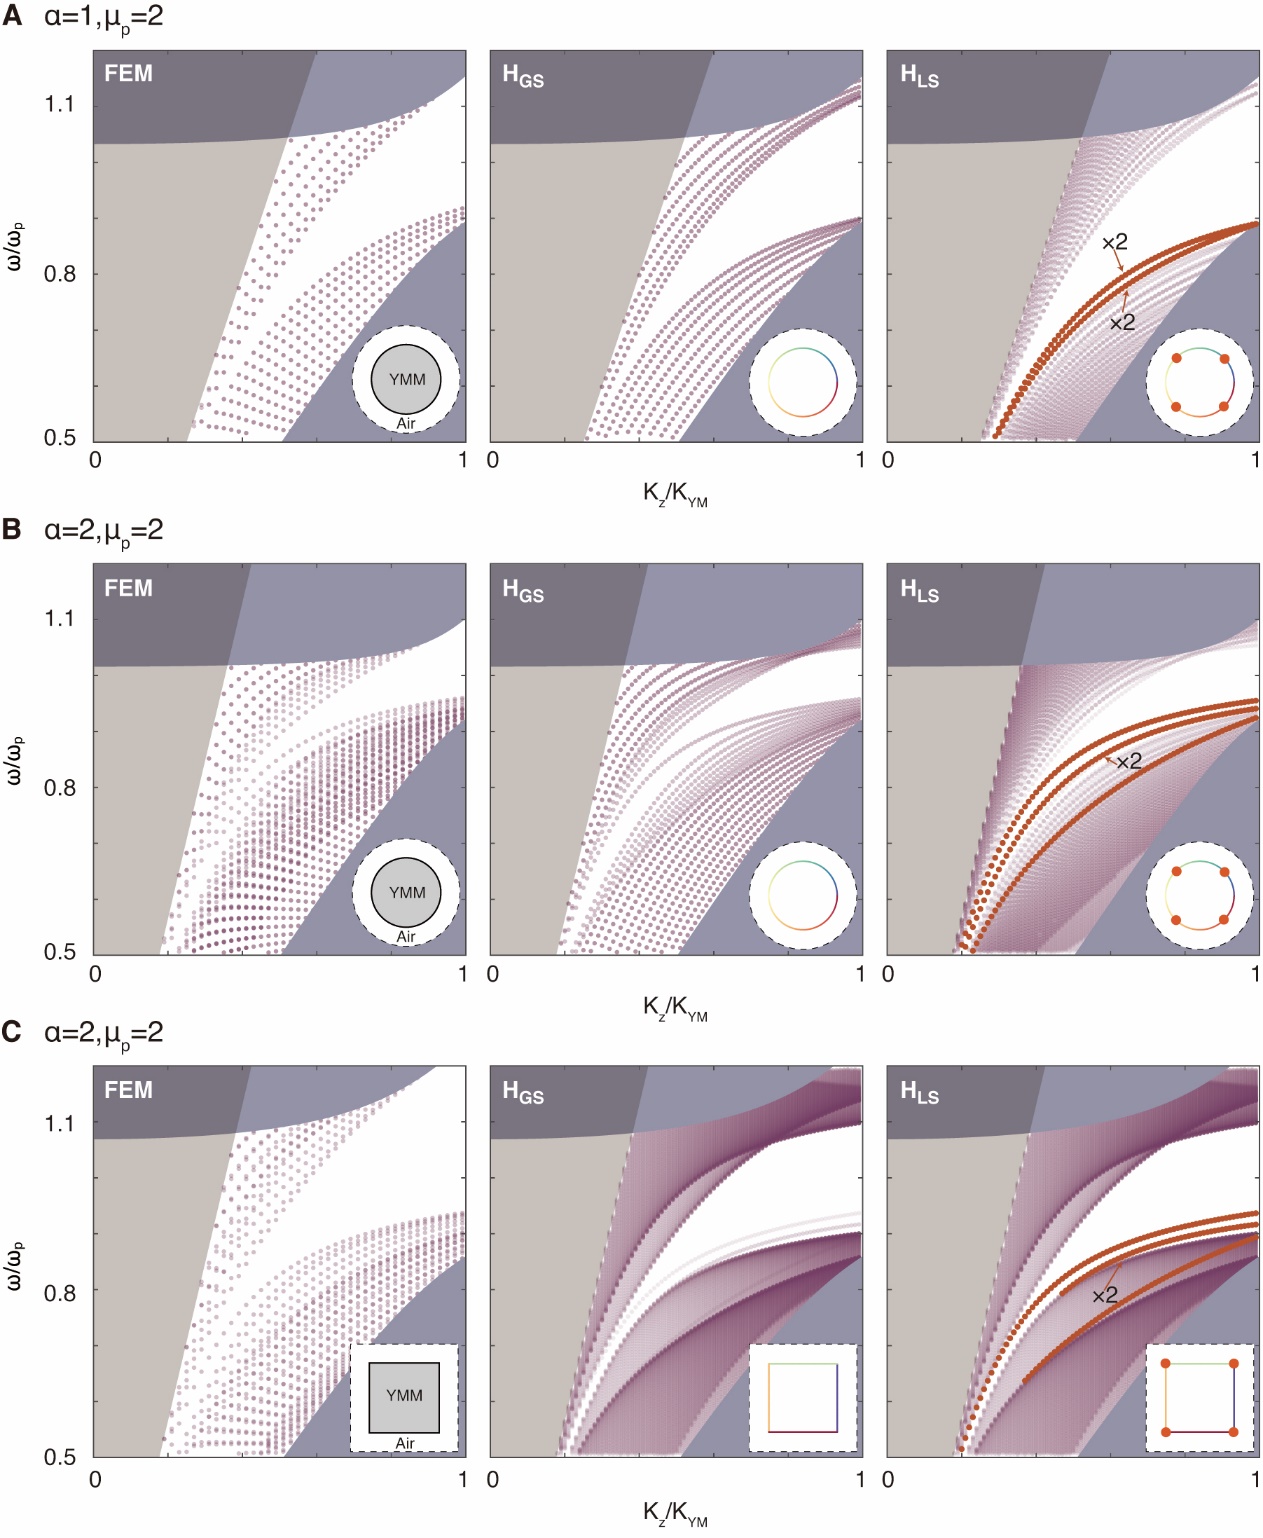


**Figure S8. Dispersion spectra in various YMM cylinders obtained through three different methods.** Dispersion spectra are shown for (a-b) circular and (c) square cylinders constructed from the homogeneous YMM, with hinge state labeled by orange dots in the right panel. Left: FEM simulations based on the EMT; Middle: 1D PWEM based on the global surface Hamiltonian; Right: combined CZM/edge states solutions derived from the local surface Hamiltonians near four critical points.


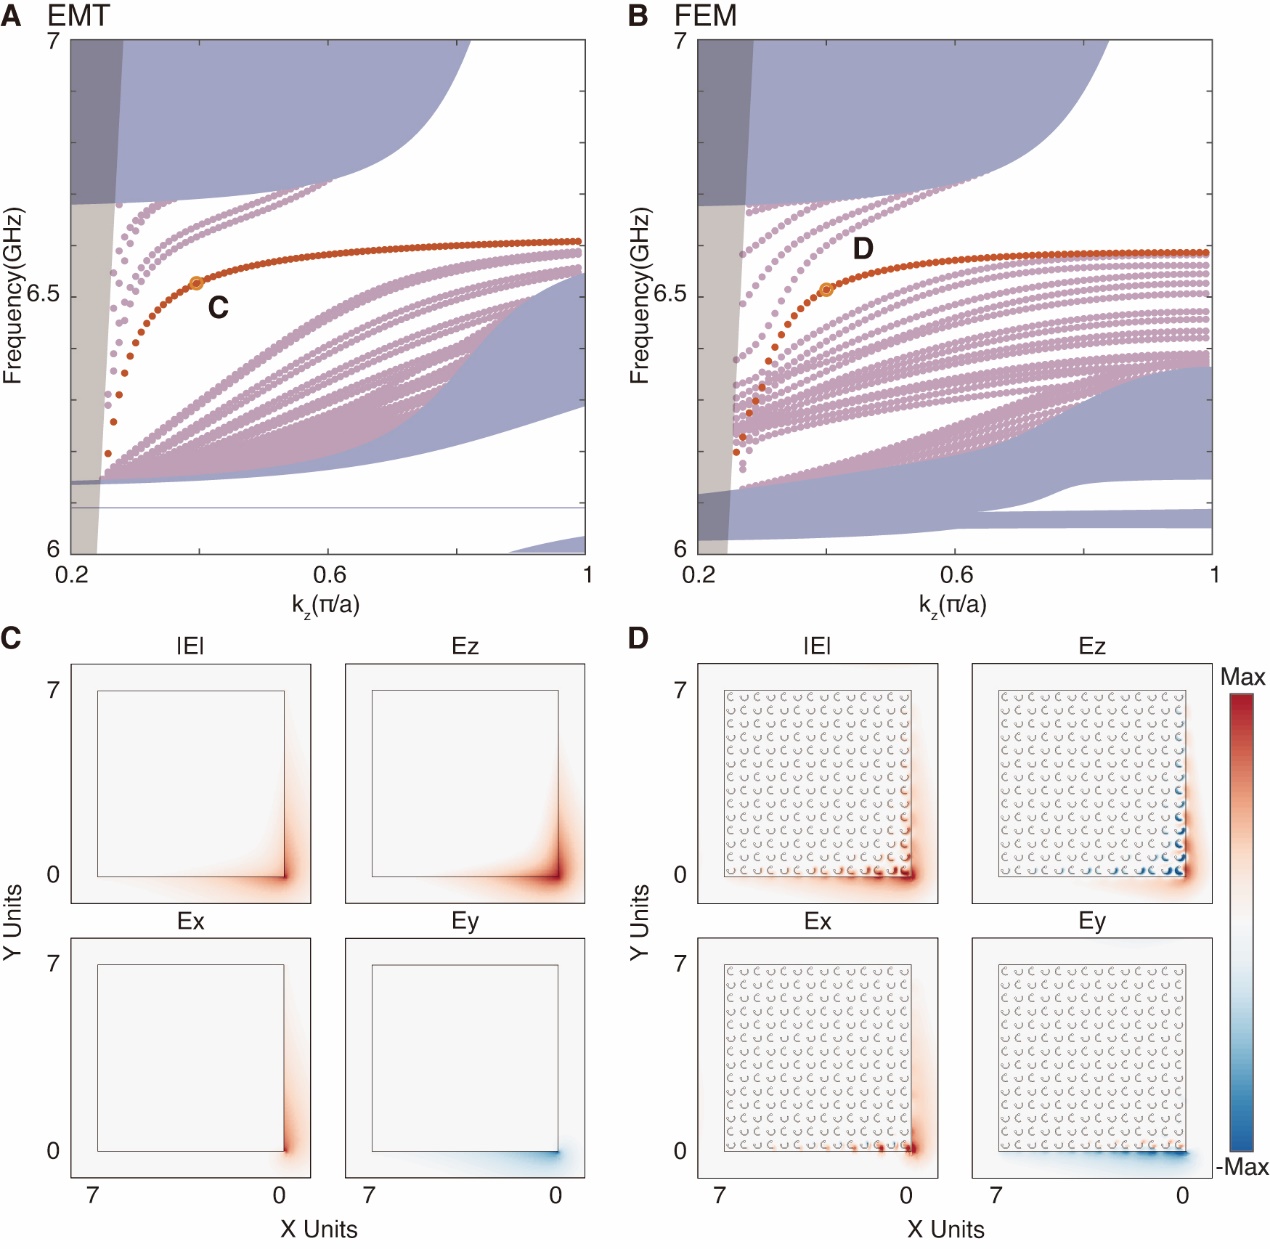


**Figure S9. The dispersion spectra and field distributions of the designed finite-size YMM cylindrical sample.** (a-b) Dispersion spectra obtained (a) based on the fitted effective medium parameters and (b) from direct simulations of the actual metamaterial structure. (c-d) Field distributions corresponding to the isolated hinge mode at , including the magnitude of the electric field and its three individual components.


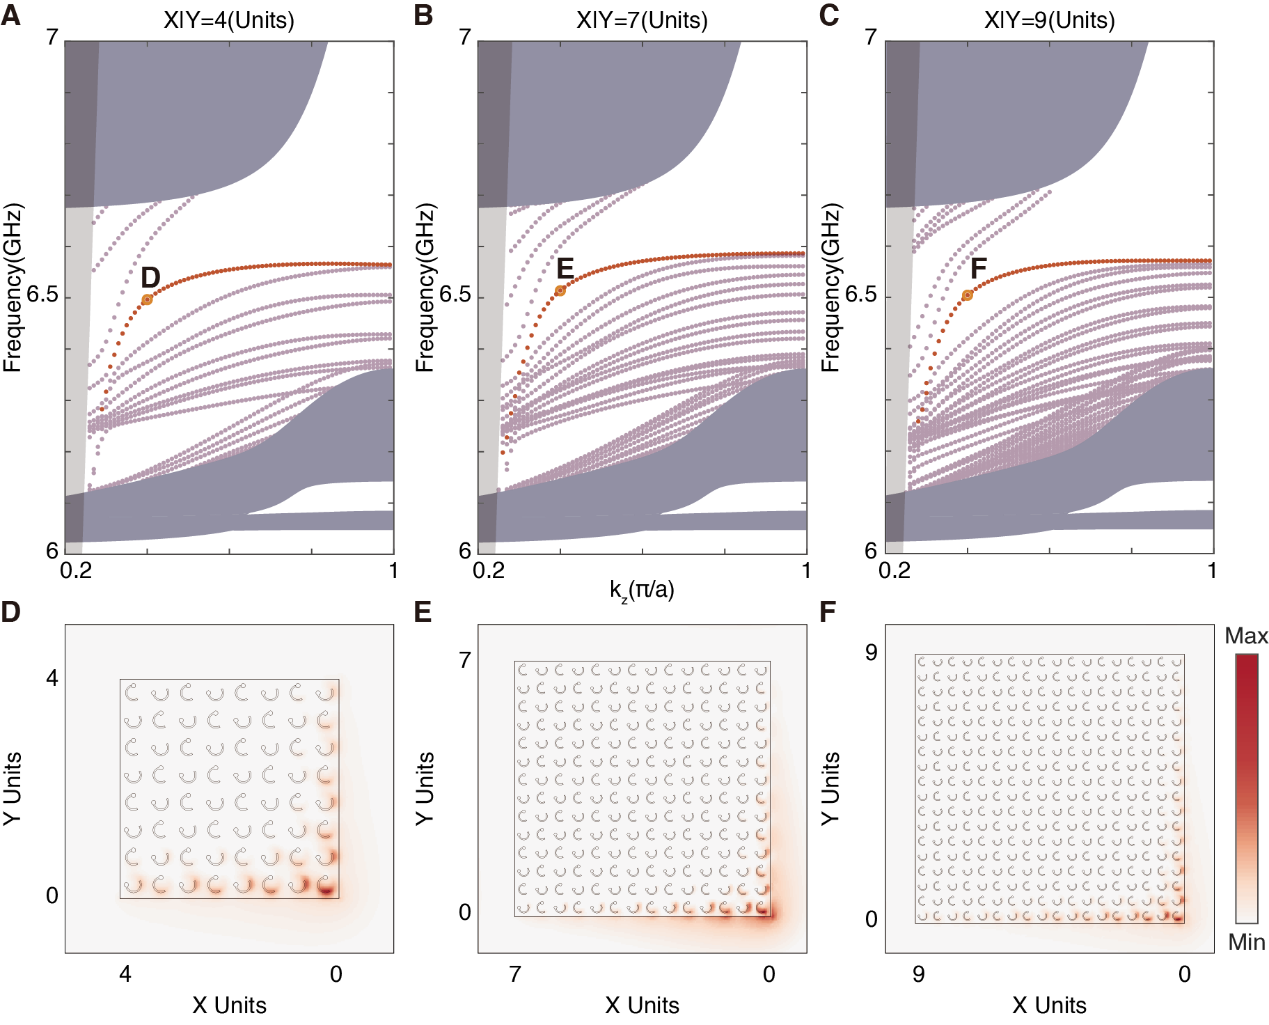


**Figure S10. Dispersion spectra for YMM cylinder of various sizes, obtained from direct simulations of the actual structure.** (a-c) Dispersion spectra for different cylinder sizes, with the isolated hinge state within the surface bandgap highlighted in orange. (d-f) Field distributions corresponding to the isolated hinge mode at .


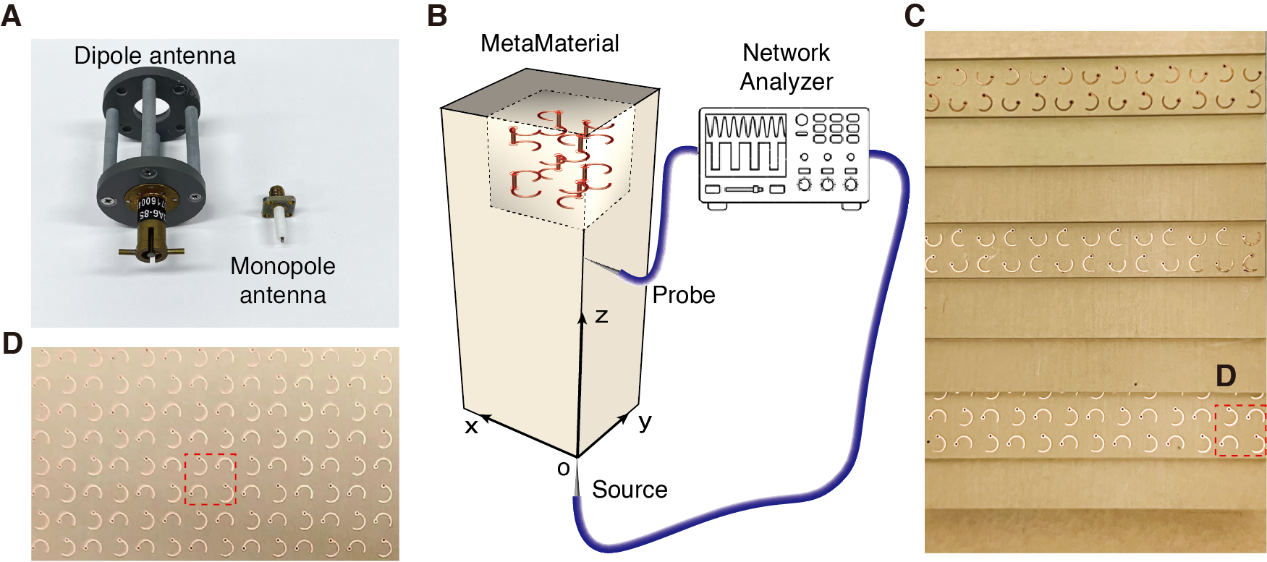


**Figure S11. Schematic diagram of the experimental setup.** (a) Photographs of the antennas. (b) Schematic of the experimental setup to detect the hinge field distributions of the metamaterial. (c) Photographs of the metamaterial, with each unit cell containing six layers along the 𝑧 direction. (d) The zoomed photographs of a single PCB layer.

**
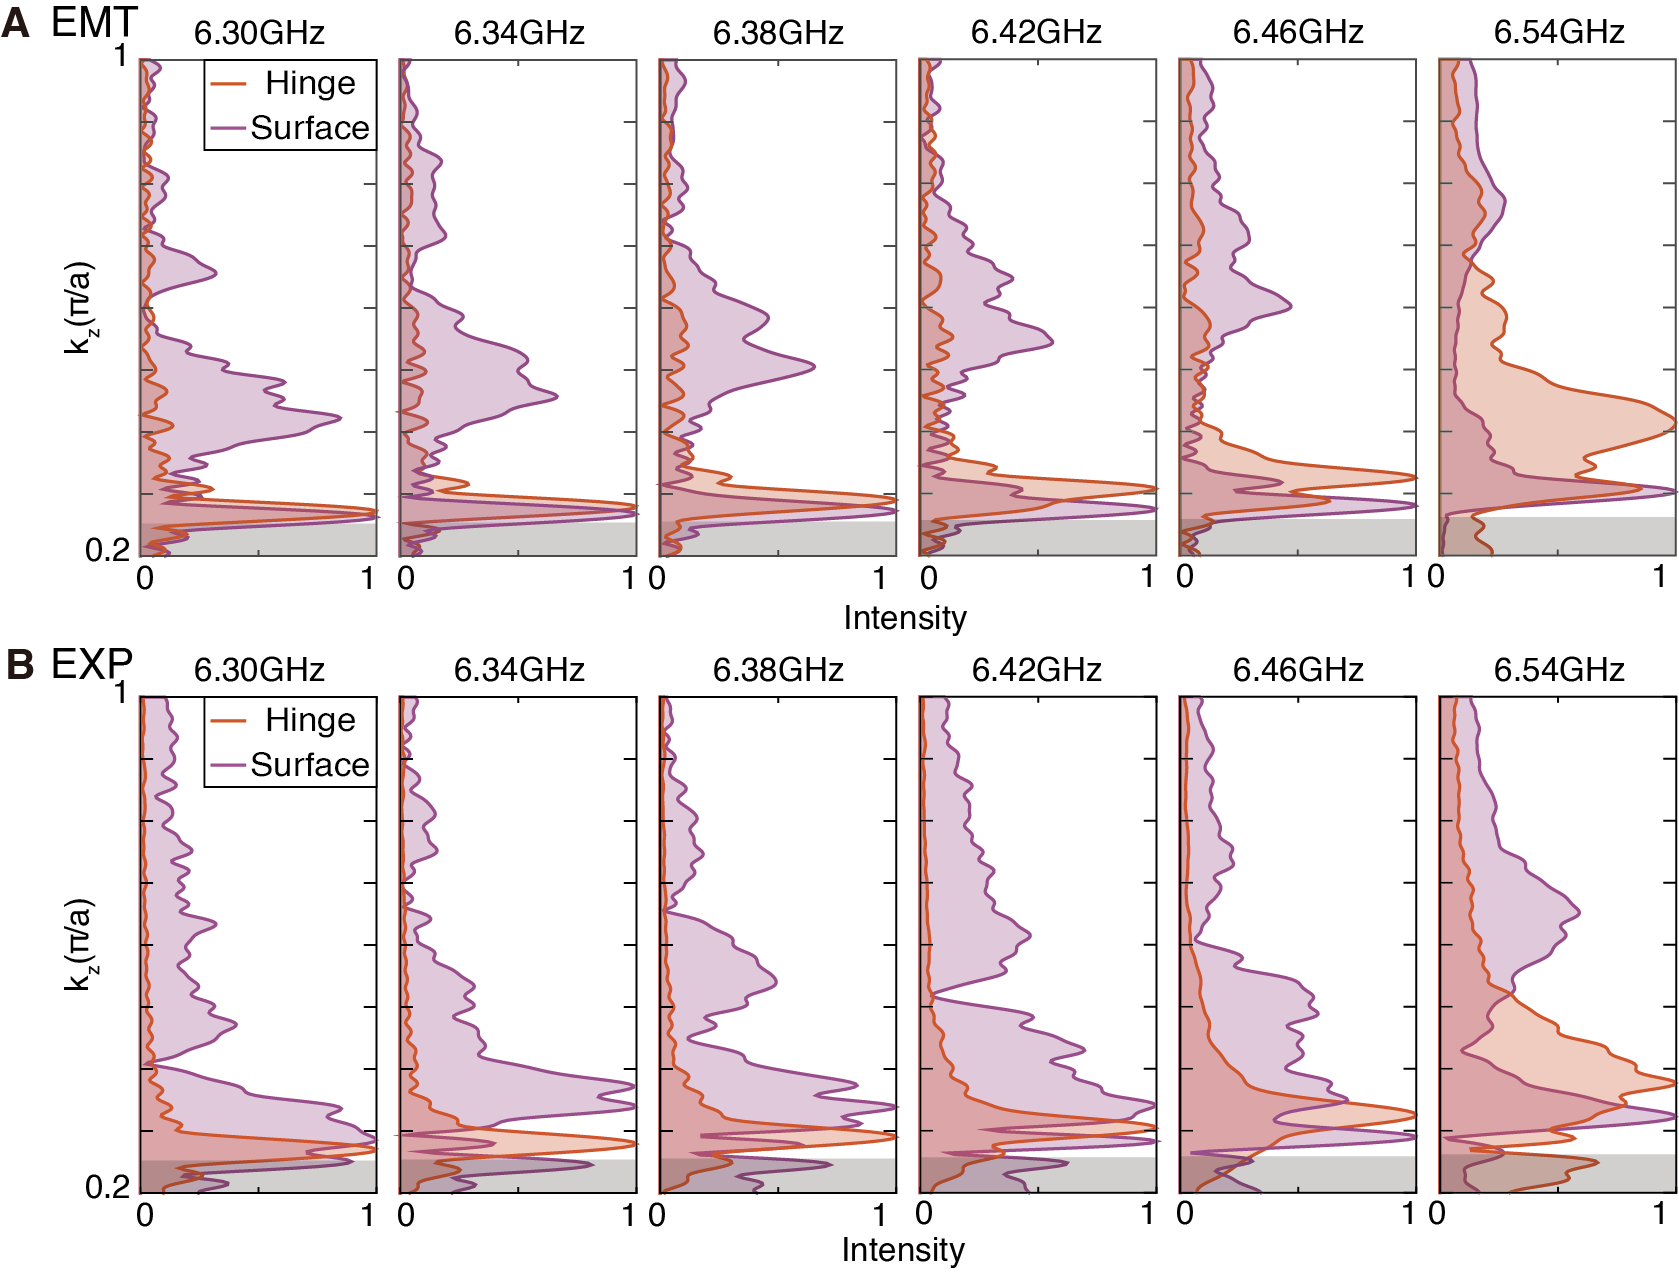
**

**Figure S12. Comparison of the -dependent strength of the surface and hinge states at different frequencies.** (a) The corresponding results obtained from EMT-based FEM simulations on a cylindrical structure of the same size. (b) The measured intensities distributions of the surface and hinge modes at different frequencies.

**
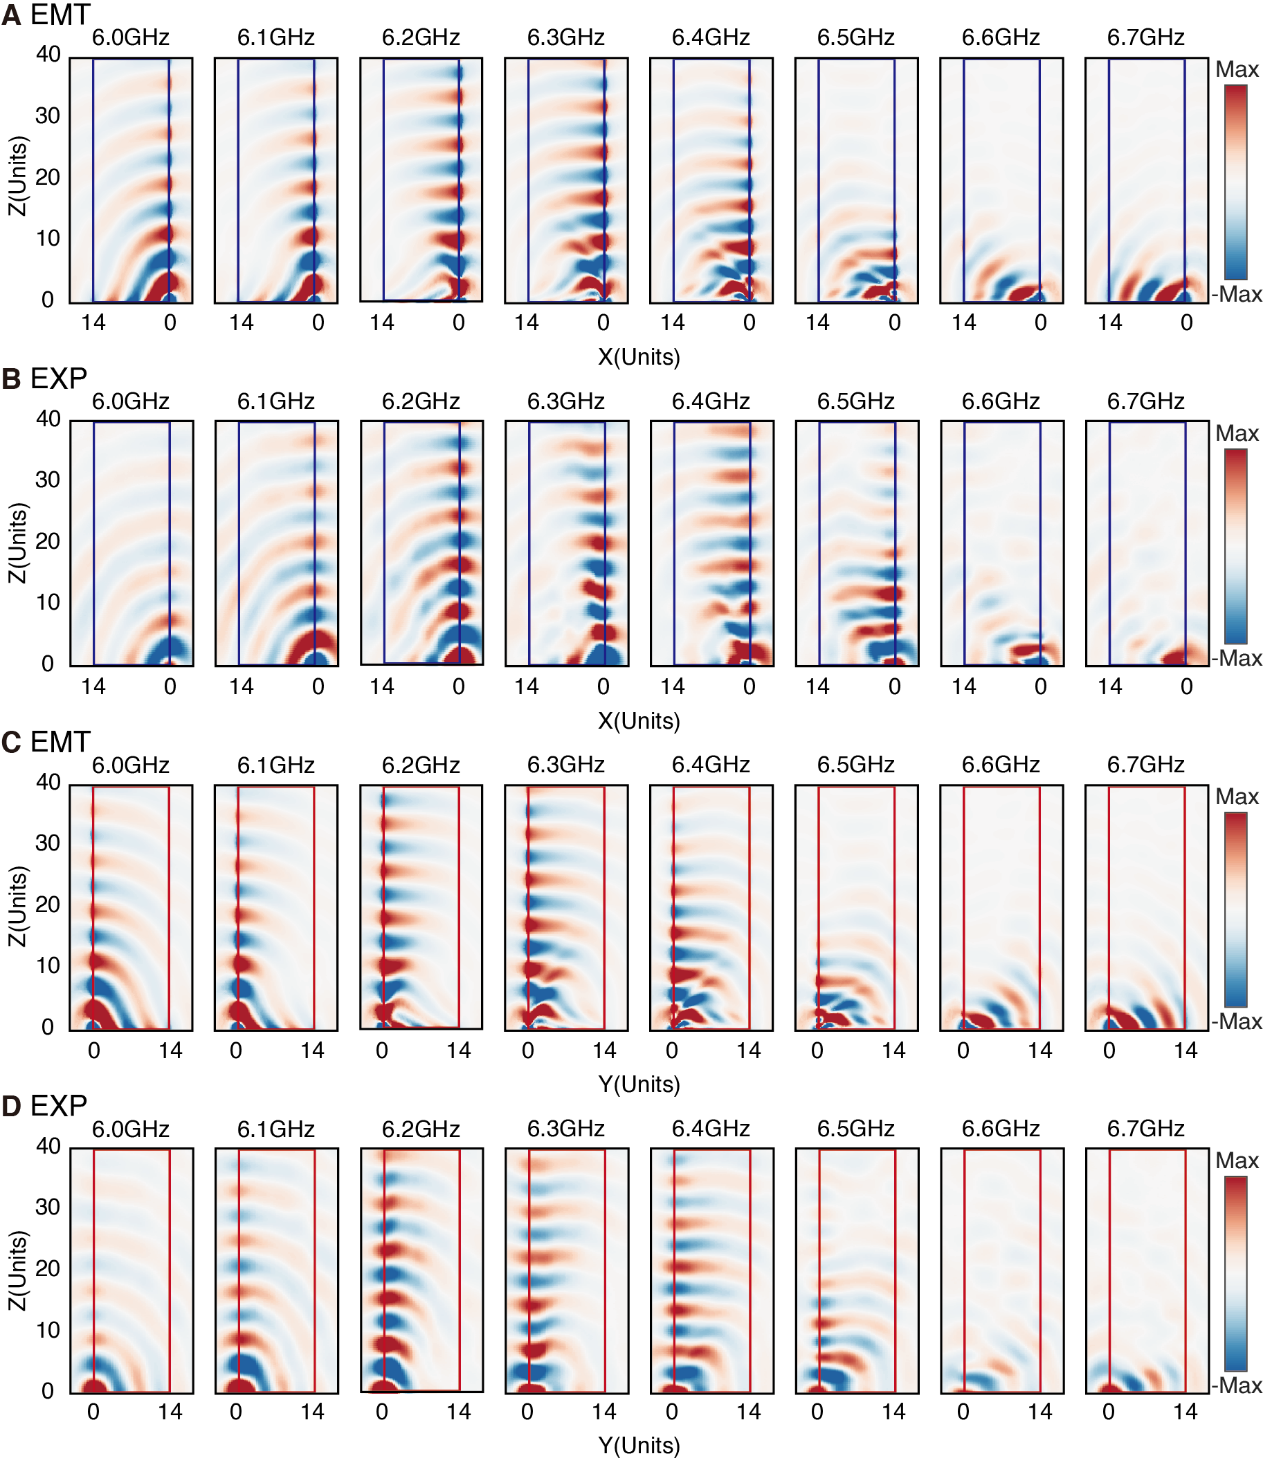
**

**Figure S13. Simulated and measured field distributions in the and planes at different frequencies with corner excitation.** (a) The simulated -field distribution in the plane at different frequencies. (b) The corresponding experimental results measured in the plane using a vertically positioned monopole antenna placed close to the surface. (c, d) The counterpart of (a, b) for -field distribution, in the plane. The range of the color bar is fixed separately for simulated and experimental data.


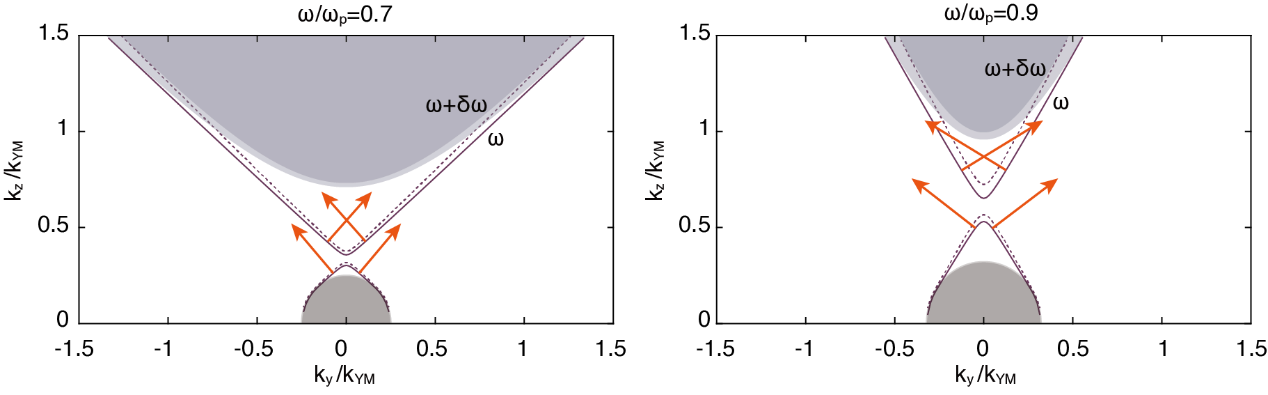


**Figure S14. Schematic diagram of the equal frequency contour and group velocity of the surface states at different frequencies.**


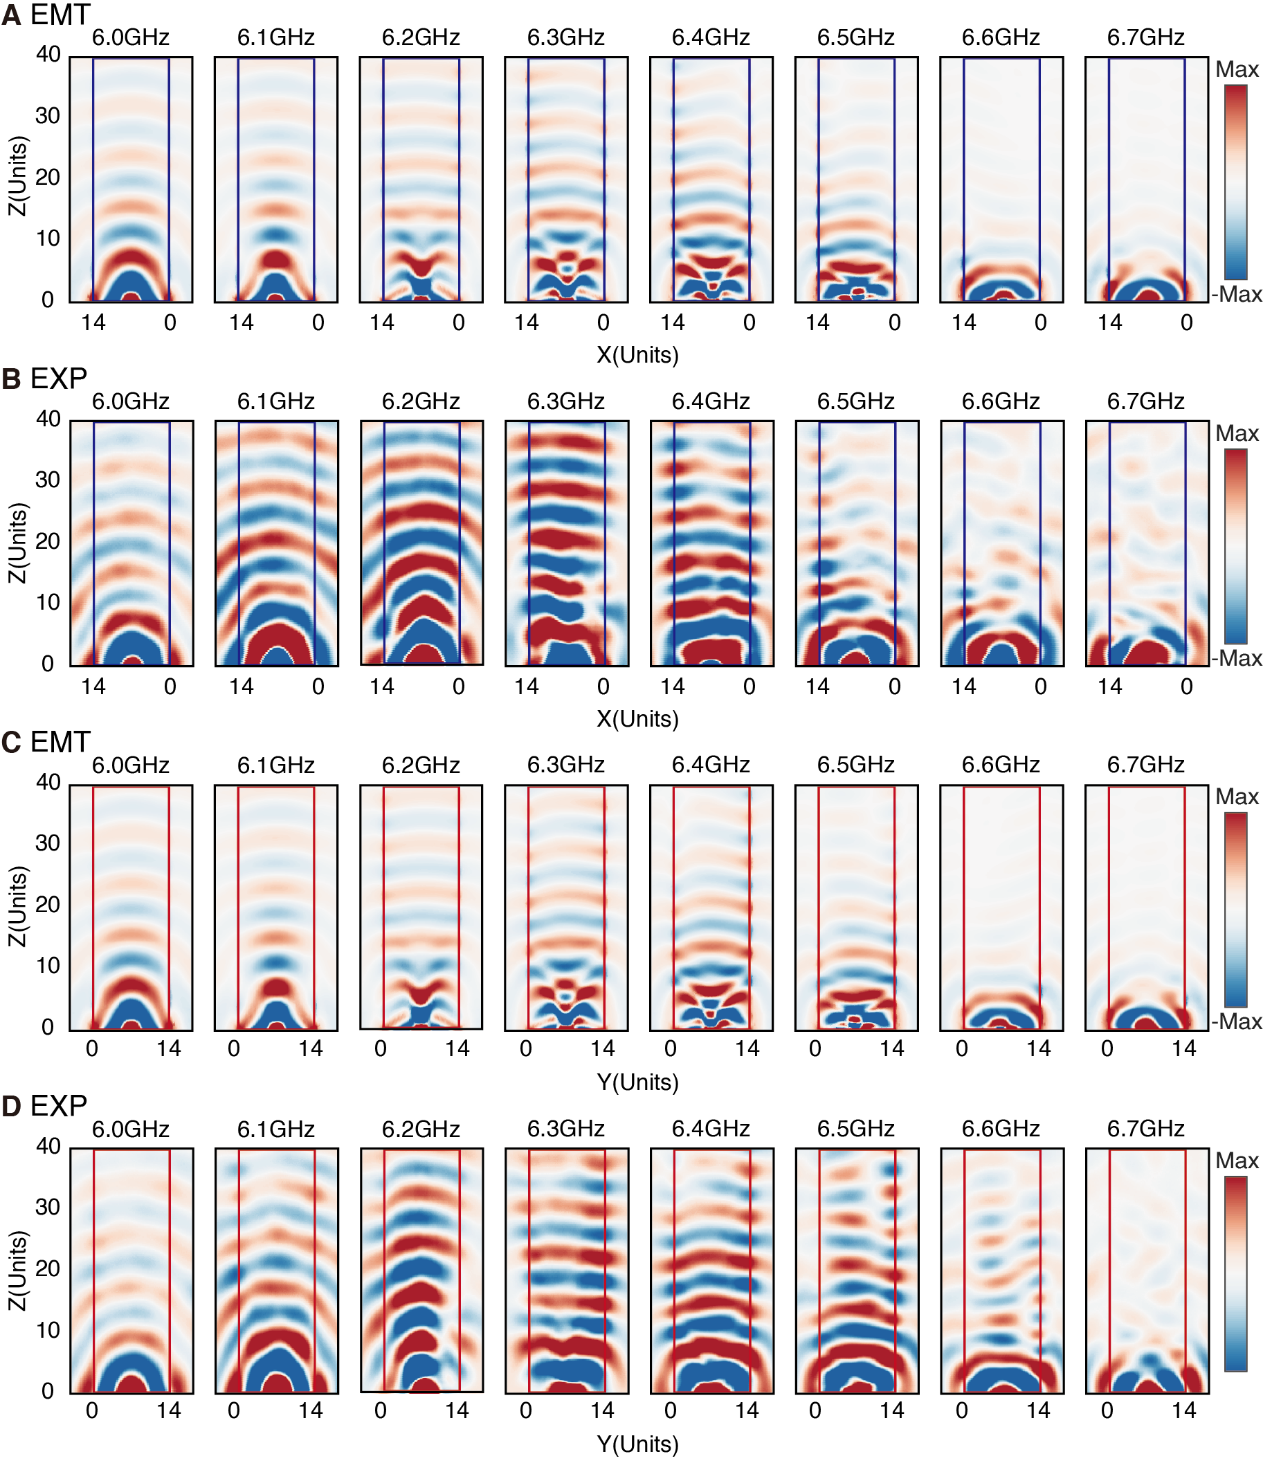


**Figure S15. Simulated and measured field distributions in the and planes at different frequencies with excitation at the center of the bottom edge.** (a) The simulated -field distribution in the plane at different frequencies, with excitation at the center of bottom edge. (b) The corresponding experimental results measured in the plane using a vertically positioned monopole antenna placed close to the surface. (c, d) The counterpart of (a, b) for -field distribution, in the plane, with excitation at the center of bottom edge. The range of the color bar is fixed separately for simulated and experimental data.

**
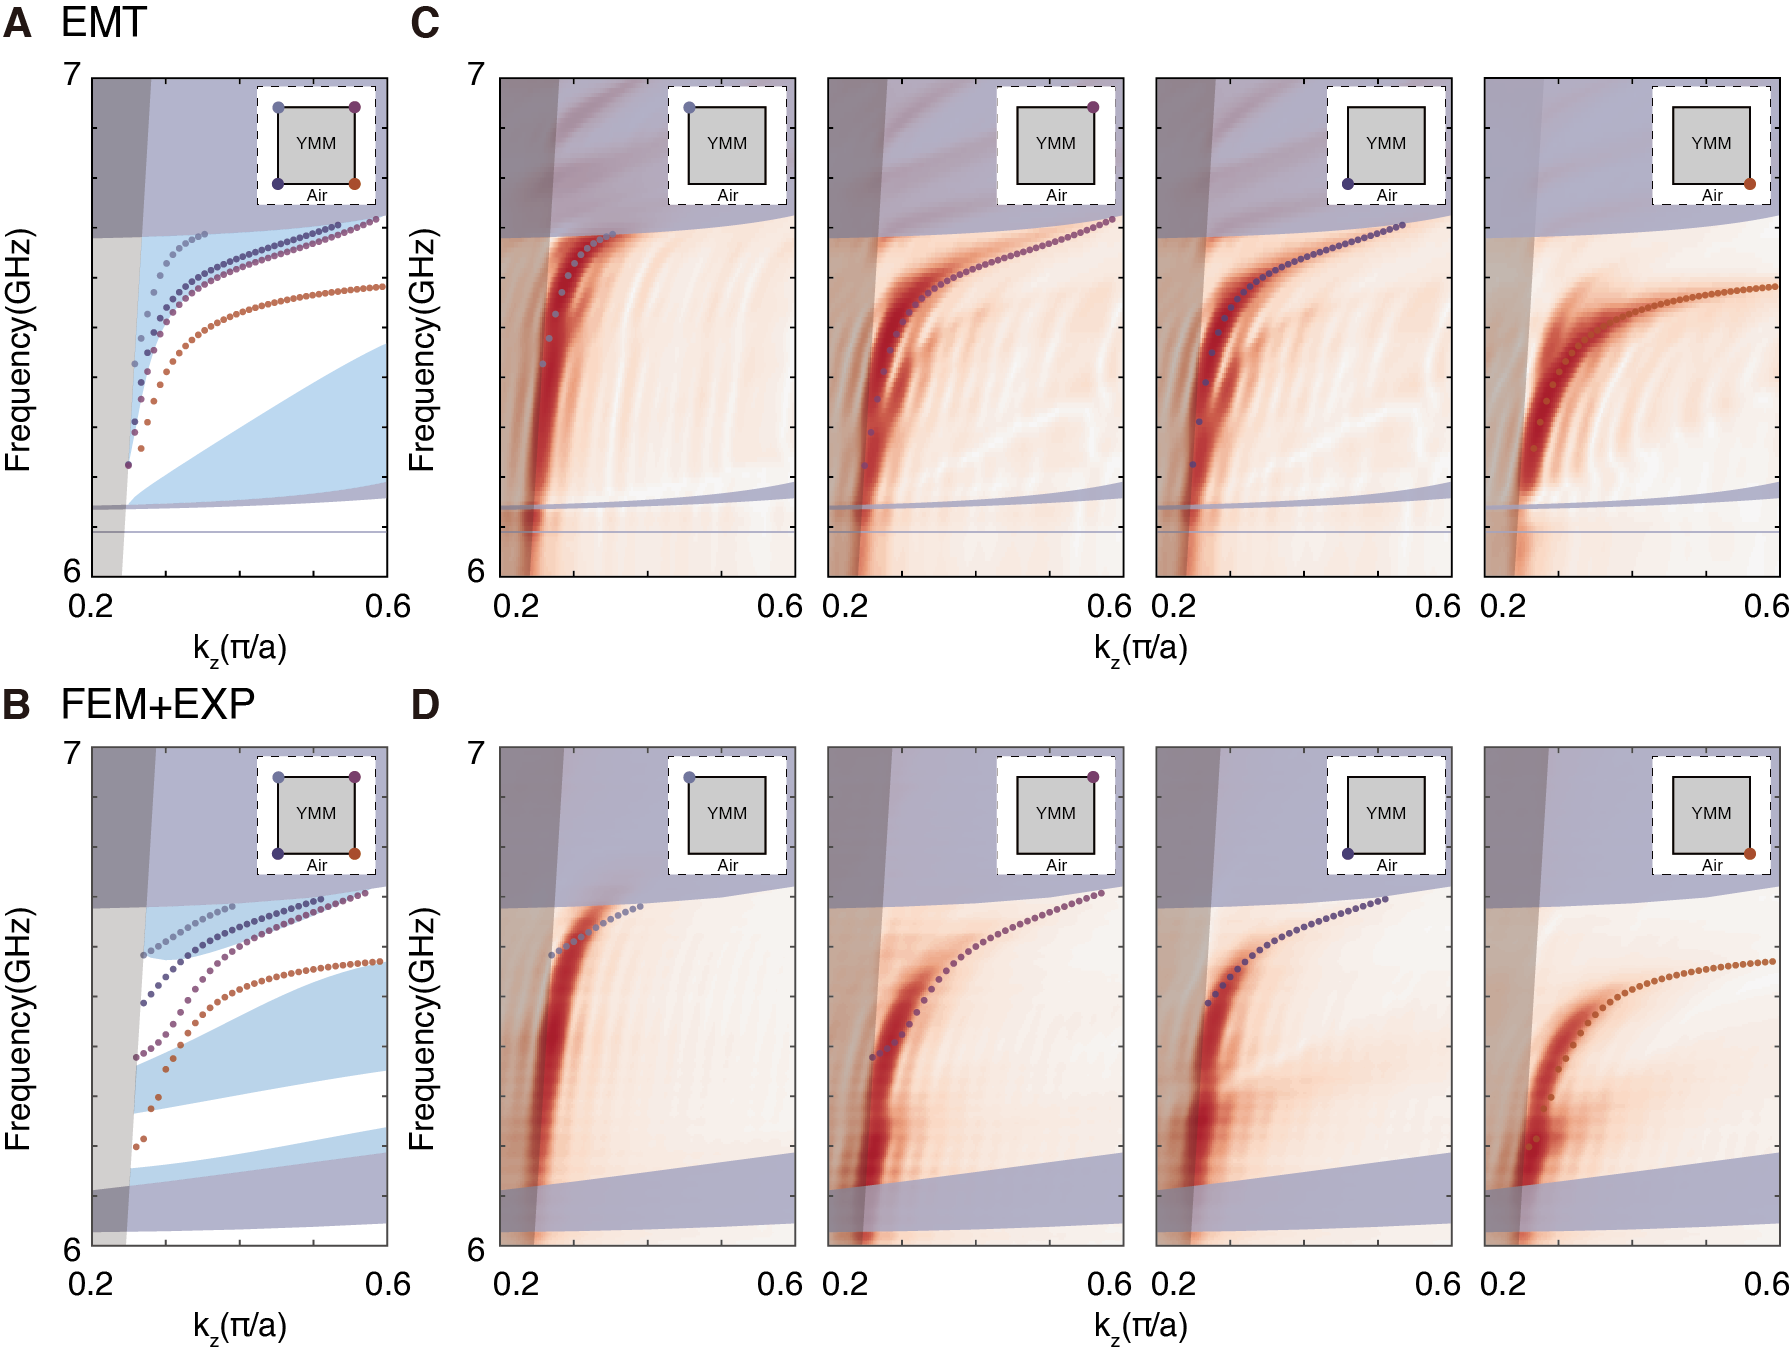
**

**Figure S16. Simulated and measured dispersion spectra for four hinge states.** (a-b) Simulated dispersion spectra for the four hinge states along different corners of a square cylinder: (a) based on the fitted effective medium parameters and (b) from direct simulations of the actual metamaterial structure. The regions of bulk and surface states in the YMM system are shown in purple and blue, respectively, while the dispersion spectra of four hinge states are represented by colored dotted lines. The inset depicts the hinge locations corresponding to the dispersion spectra shown in different colors. (c-d) Simulated and measured excitation spectra obtained through Fourier-transformed field distributions for each individual excitation and measurement.

**Reference**

[1] S. Ma, Y. Bi, Q. Guo, B. Yang, O. You, J. Feng, H.-B. Sun, and S. Zhang, Science **373**, 572 (2021).

[2] S. Ma, H. Jia, Y. Bi, S. Ning, F. Guan, H. Liu, C. Wang, and S. Zhang, Physical Review Letters **130**, 243801 (2023).

[3] X. L. Qi, T. L. Hughes, and S. C. Zhang, Physical Review B **78**, 195424 (2008).

[4] B. Lian and S. C. Zhang, Physical Review B **94**, 041105 (2016).

[5] Y. X. Zhao and S. A. Yang, Physical Review Letters **126**, 046401 (2021).

[6] V. Lukose, R. Shankar, and G. Baskaran, Physical Review Letters **98**, 116802 (2007).

[7] S. Ma, B. Yang, and S. Zhang, Photonics Insights **1**, R02 (2022).
